# Supplementary material
Source: ML conference proceedings conference paper supplement (https://aclanthology.org/2024.lrec-main.888)

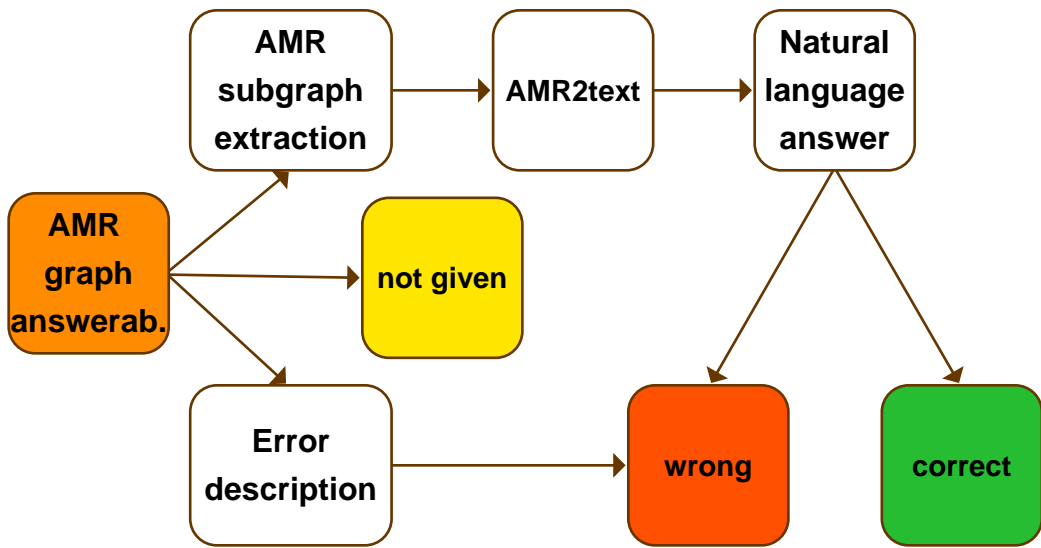

Supplement: OptionalSupplementaryMaterial [file 2024.lrec-main.888.OptionalSupplementaryMaterial.zip]
